# Supplementary material
Source: PubMed Central journal article supplement (PMC7318101)
Supplement: NIHMS1058775-supplement-Supp_info.pdf [file NIHMS1058775-supplement-Supp_info.pdf]

# Medicaid Policy and Liver Transplant for Alcohol-Associated Liver Disease

## Supplementary Appendix:

Table of contents:

### Supplementary Results

|                                                                                                                |      |
|----------------------------------------------------------------------------------------------------------------|------|
| Proportion of Payment by Medicaid for LT in ALD including Patients with Hepatocellular Carcinoma.....          | p. 2 |
| Proportion of Payment by Private Insurance for LT in ALD including Patients with Hepatocellular Carcinoma..... | p. 2 |

### Supplementary Tables

|                                                                                                                                                                           |      |
|---------------------------------------------------------------------------------------------------------------------------------------------------------------------------|------|
| Table S1. Classification of State Policies, Proportion of Liver Transplants for Alcohol-Associated Liver Disease Paid by Medicaid vs. Non-Medicaid Between 2002-2017..... | p. 4 |
| Table S2. Recipient Characteristics at Time of Liver Transplant among Between 2002-2011 vs. 2012-2017.....                                                                | p. 6 |

## **SUPPLEMENTARY RESULTS**

### **Proportion of Payment by Medicaid for LT in ALD including Patients with Hepatocellular Carcinoma**

In an analysis adjusting for individual-level characteristics affecting likelihood of LT, region wait-time, differences by era in unrestricted states, and differences between restricted and unrestricted states in 2002-11, a restricted policy was associated with lower odds of LT paid by Medicaid for ALD in 2012-17 (aOR 0.76, 95% CI 0.57-0.96,  $p=0.04$ ). Between 2002-11, the adjusted proportion of LT paid by Medicaid was 18.0% (95% CI 15.8-20.2%) vs. 19.7% (95% CI, 16.6-22.9%) among restricted vs. unrestricted states. Between 2012-17, the adjusted proportion of LT paid by Medicaid was 17.1% (95% CI, 14.7-19.6%) vs. 23.0% (95% CI, 19.5-26.6%) among restricted vs. unrestricted states. In difference-of-difference analysis, restricted (vs. unrestricted) policies were associated with an absolute decrease of 4.1% (95% CI, 0.2-8.1%,  $p=0.04$ ) in adjusted proportion of LT paid by Medicaid after 2011.

In adjusted analysis to ensure our findings were not due to different prevalence of ALD among total LT recipients, we confirmed that a restricted policy was not associated with an increase in the odds of ALD among total LT recipients between 2012-17 (aOR 1.09, 95% CI 0.94-1.27,  $p=0.26$ ).

### **Proportion of Payment by Private Insurance for LT in ALD including Patients with Hepatocellular Carcinoma**

To assess proportion of private insurance payment among LT for ALD recipients, in an analysis adjusting for individual-level characteristics affecting likelihood of LT, region wait-time, differences by era in unrestricted states, and differences between restricted

and unrestricted states in 2002-11, restricted policy was associated with similar odds of LT for ALD paid by private insurance in 2012-17 (aOR 1.18, 95% CI 0.96-1.45, p=0.12). Between 2002-11, the adjusted proportion of LT paid by private insurance was 62.0% (95% CI 59.7-64.4%) vs. 57.5% (95% CI, 54.6-60.5%) among restricted vs. unrestricted states. Between 2012-17, the adjusted proportion of LT paid by private insurance was 59.9% (95% CI, 56.9-62.8%) vs. 51.4% (95% CI, 47.9-55.0%) among restricted vs. unrestricted states. In difference-of-difference analysis, restricted (vs. unrestricted) policies were associated with an absolute increase of 3.9% (95% CI, -0.9 to +8.7%, p=0.11) in adjusted proportion of LT paid by private insurance after 2011.

**Supplemental Table 1. Classification of State Policies, Proportion of Liver Transplants for Alcohol-Associated Liver Disease Paid by Medicaid vs. Non-Medicaid Between 2002-2017**

| Restrictive States   |                    |                |             | Unrestrictive States |                    |                |           |
|----------------------|--------------------|----------------|-------------|----------------------|--------------------|----------------|-----------|
| State                | Non-Medicaid N (%) | Medicaid N (%) | Total       | State                | Non-Medicaid N (%) | Medicaid N (%) | Total     |
| Arizona              | 175 (80.3)         | 43 (19.7)      | 218 (100)   | Alabama              | 152 (93.8)         | 10 (6.2)       | 162 (100) |
| Arkansas             | 39 (72.2)          | 15 (27.8)      | 54 (100)    | Connecticut          | 50 (66.7)          | 25 (33.3)      | 75 (100)  |
| California           | 790 (70.7)         | 327 (29.3)     | 1,117 (100) | Florida              | 812 (83.4)         | 161 (16.5)     | 973 (100) |
| Colorado             | 87 (73.1)          | 32 (26.9)      | 119 (100)   | Kansas               | 101 (82.1)         | 22 (17.9)      | 123 (100) |
| District of Columbia | 103 (83.1)         | 21 (16.9)      | 124 (100)   | Kentucky             | 143 (74.1)         | 50 (25.9)      | 193 (100) |
| Georgia              | 318 (87.1)         | 47 (12.9)      | 365 (100)   | Maryland             | 276 (76.7)         | 84 (23.3)      | 360 (100) |
| Hawaii               | 8 (80.0)           | 2 (20.0)       | 10 (100)    | Minnesota            | 248 (89.5)         | 29 (10.5)      | 277 (100) |
| Illinois             | 420 (77.1)         | 125 (22.9)     | 545 (100)   | Missouri             | 168 (80.4)         | 41 (19.6)      | 209 (100) |
| Indiana              | 205 (82.3)         | 44 (17.7)      | 249 (100)   | New York             | 421 (77.7)         | 121 (22.3)     | 542 (100) |
| Iowa                 | 41 (71.9)          | 16 (28.1)      | 57 (100)    | Oregon               | 52 (85.2)          | 9 (14.8)       | 61 (100)  |
| Louisiana            | 316 (90)           | 35 (10.0)      | 351 (100)   | Puerto Rico          | 18 (78.3)          | 5 (21.7)       | 23 (100)  |
| Massachusetts        | 302 (76.8)         | 91 (23.2)      | 393 (100)   | South Carolina       | 73 (79.4)          | 19 (20.6)      | 92 (100)  |
| Michigan             | 279 (86.1)         | 45 (13.9)      | 324 (100)   | Virginia             | 131 (84.5)         | 24 (15.5)      | 155 (100) |
| Nebraska             | 100 (80.6)         | 24 (19.4)      | 124 (100)   | Wisconsin            | 382 (76.4)         | 118 (23.6)     | 500 (100) |
| New Jersey           | 12 (38.7)          | 19 (61.3)      | 31 (100)    |                      |                    |                |           |
| North Carolina       | 184 (93.9)         | 12 (6.1)       | 196 (100)   |                      |                    |                |           |
| Ohio                 | 307 (78.1)         | 86 (21.9)      | 393 (100)   |                      |                    |                |           |
| Oklahoma             | 45 (86.5)          | 7 (13.5)       | 52 (100)    |                      |                    |                |           |
| Pennsylvania         | 767 (85.8)         | 127 (14.2)     | 894 (100)   |                      |                    |                |           |
| South Dakota         | 3 (50.0)           | 3 (50.0)       | 6 (100)     |                      |                    |                |           |
| Tennessee            | 216 (86.4)         | 34 (13.6)      | 250 (100)   |                      |                    |                |           |

|            |               |           |              |  |  |  |  |
|------------|---------------|-----------|--------------|--|--|--|--|
| Texas      | 889<br>(91.0) | 88 (9.0)  | 977<br>(100) |  |  |  |  |
| Utah       | 65 (76.5)     | 20 (23.5) | 85<br>(100)  |  |  |  |  |
| Washington | 125<br>(79.6) | 32 (20.4) | 157<br>(100) |  |  |  |  |

States not included in this study due to no LTs performed in 2017: Alaska, Idaho, Maine, Mississippi, Montana, Nevada, New Hampshire, New Mexico, North Dakota, Rhode Island, Vermont, West Virginia, Wyoming

**Supplemental Table 2. Recipient Characteristics at Time of Liver Transplant between 2002-2011 vs. 2012-2017**

| Recipient Characteristic             | 2002-2011<br>(N=5,421) | 2012-2017<br>(N=5,415) | P      |
|--------------------------------------|------------------------|------------------------|--------|
| Age – yr – median (IQR)              | 54 (48-60)             | 53 (46-59)             | <0.001 |
| Male, n (%)                          | 4,222 (78)             | 4,028 (74)             | <0.001 |
| Medicaid Insurance, n (%)            | 977 (18)               | 1,036 (19)             | 0.14   |
| Private Insurance, n (%)             | 3,270 (60)             | 3,119 (58)             | 0.004  |
| Race / Ethnicity, n (%)              |                        |                        | 0.002  |
| Caucasian                            | 4,357 (80)             | 4,264 (79)             |        |
| African American                     | 212 (4)                | 222 (4)                |        |
| Hispanic                             | 743 (14)               | 756 (14)               |        |
| Asian                                | 51 (1)                 | 93 (2)                 |        |
| Other                                | 58 (1)                 | 80 (2)                 |        |
| Highest Education Level, n (%)       |                        |                        | <0.001 |
| High School or Below                 | 2,336 (43)             | 2,255 (42)             |        |
| College or Above                     | 2,045 (38)             | 2,815 (52)             |        |
| Unknown                              | 1,040 (19)             | 345 (6)                |        |
| Body Mass Index, median (IQR)        | 27.6 (24.3-31.6)       | 28.2 (24.7-32.3)       | <0.001 |
| Diabetes*, n (%)                     | 1,033 (19)             | 938 (17)               | <0.001 |
| Renal Replacement Therapy, n (%)     | 882 (16)               | 1,449 (27)             | <0.001 |
| Portal Vein Thrombosis at LT** n (%) | 343 (6)                | 528 (10)               | <0.001 |
| MELD Score at LT, median (IQR)       | 24 (18-31)             | 30 (23-37)             | <0.001 |
| SLK Recipient, n (%)                 | 489 (9)                | 690 (13)               | <0.001 |
| Region Wait Time, n (%)              |                        |                        | 0.66   |
| Low                                  | 1,994 (37)             | 2,014 (37)             |        |
| Medium                               | 2,223 (41)             | 2,175 (40)             |        |
| High                                 | 1,204 (22)             | 1,226 (23)             |        |
| Days on Waitlist, median (IQR)       | 37 (10-141)            | 22 (7-93)              | <0.001 |

\*For diabetes status, 110 (2.0%) missing values in 2002-2011 group, 18 (0.3%) missing values in 2012-2017 group

\*\*For portal vein thrombosis at LT, 136 (2.5%) missing values in 2002-2011 group, 38 (0.7%) missing values in 2012-2017 group
